# Supplementary material for: Properties of Human Gastric Lipase Produced by Plant Roots
Source: MDPI journal article supplement (doi:10.3390/life12081249), 2022-08-16
Supplement: s1 [file s1]

**Table S1.** Lipase activity extracted from roots kept at room temperature for various amounts of time. Activities are mean values  $\pm$  confidence intervals ( $p = 0.95$ ;  $n = 4$ ).

| Root storage time | Extracted lipase (U/mg roots) |
|-------------------|-------------------------------|
| 1 day             | $6.4 \pm 0.79$                |
| 11 months         | $6.87 \pm 0.84$               |
| 19.5 months       | $6.98 \pm 0.55$               |
